# Supplementary material for: A nanoclay-based 3D aerogel framework for flexible flame retardants
Source: Royal Society of Chemistry journal article supplement (doi:10.1039/d2ma00556e), 2022-01-01
Supplement: d2ma00556e1.pdf [file d2ma00556e1.pdf]

## Supplementary Materials

### Nanoclay-based 3D aerogel framework for flexible flame retardants

**Weimin Xie<sup>b</sup>, Jie Wang<sup>b</sup>, Kaixuan Shang<sup>b</sup>, Hongyun Chen<sup>b</sup>, Aidong Tang<sup>e</sup>, Mingjie Wu<sup>f</sup>, Xun Cui<sup>a,c,d</sup>,  
Huaming Yang<sup>a,b,c,d\*</sup>**

<sup>a</sup> Engineering Research Center of Nano-Geomaterials of Ministry of Education, China University of Geosciences, Wuhan 430074, China.

<sup>b</sup> Hunan Key Laboratory of Mineral Materials and Application, School of Minerals Processing and Bioengineering, Central South University, Changsha 410083, China.

<sup>c</sup> Faculty of Materials Science and Chemistry, China University of Geosciences, Wuhan 430074, China.

<sup>d</sup> Key Laboratory of Functional Geomaterials in China Nonmetallic Minerals Industry, China University of Geosciences, Wuhan 430074, China.

<sup>e</sup> College of Chemistry and Chemical Engineering, Central South University, Changsha 410083, China.

<sup>f</sup> Electrochemistry/Corrosion Laboratory, Department of Chemical Engineering, McGill University, Montréal, Québec H3A 0C5 (Canada).

\*Corresponding author. Email: hm.yang@cug.edu.cn, hmyang@csu.edu.cn

**This PDF file includes:**

Supplementary Text

Figs. S1 to S11

Tables S1 to S3

Movies S1 to S5

References 1 to 15

**Other Supplementary Materials for this manuscript include the following:**

Movies S1 to S5

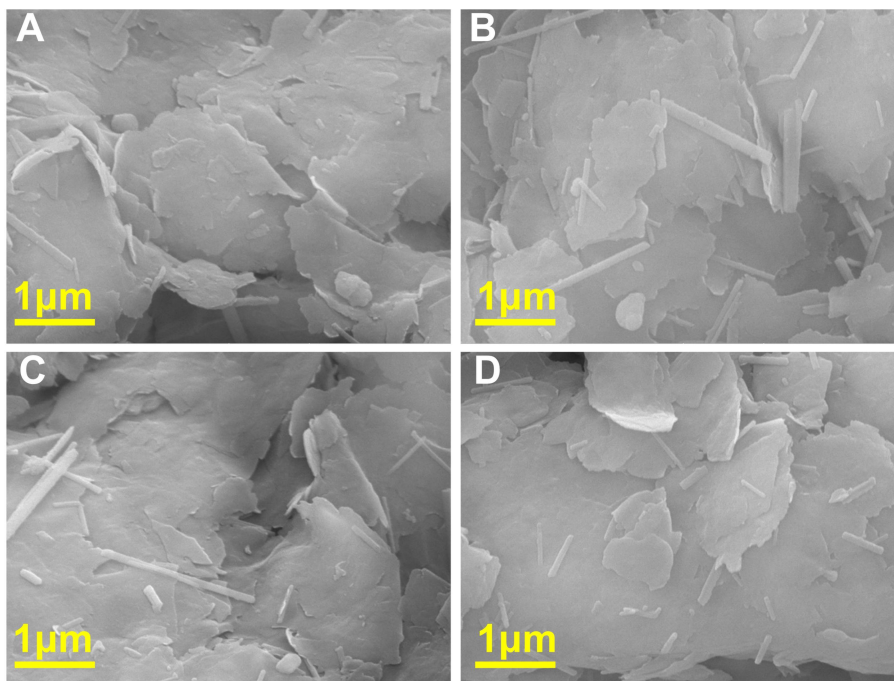

**Fig. S1** SEM images of (A) R-RT, (B) R-300, (C) R-450 and (D) R-900.

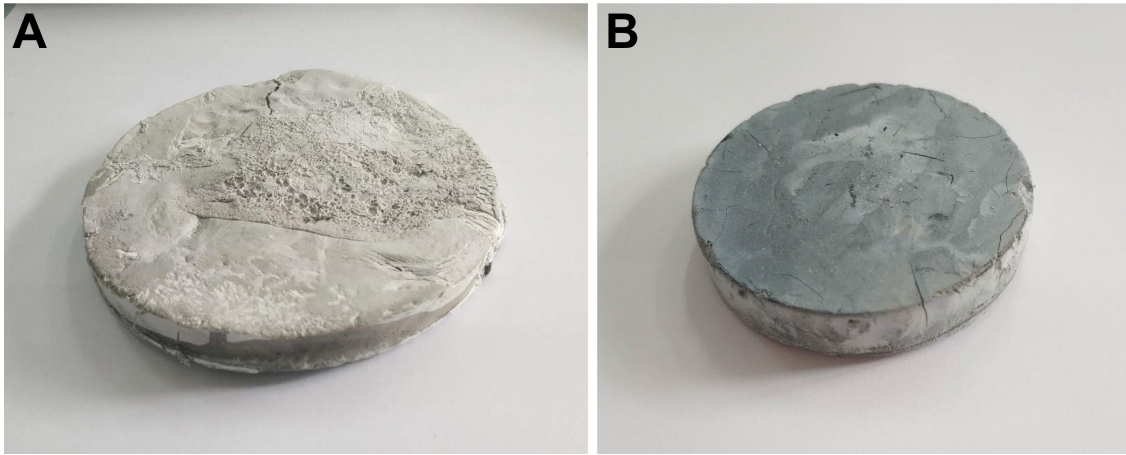

**Fig. S2** (A) Aerogel without PA; B Aerogels without synthesized PA in situ

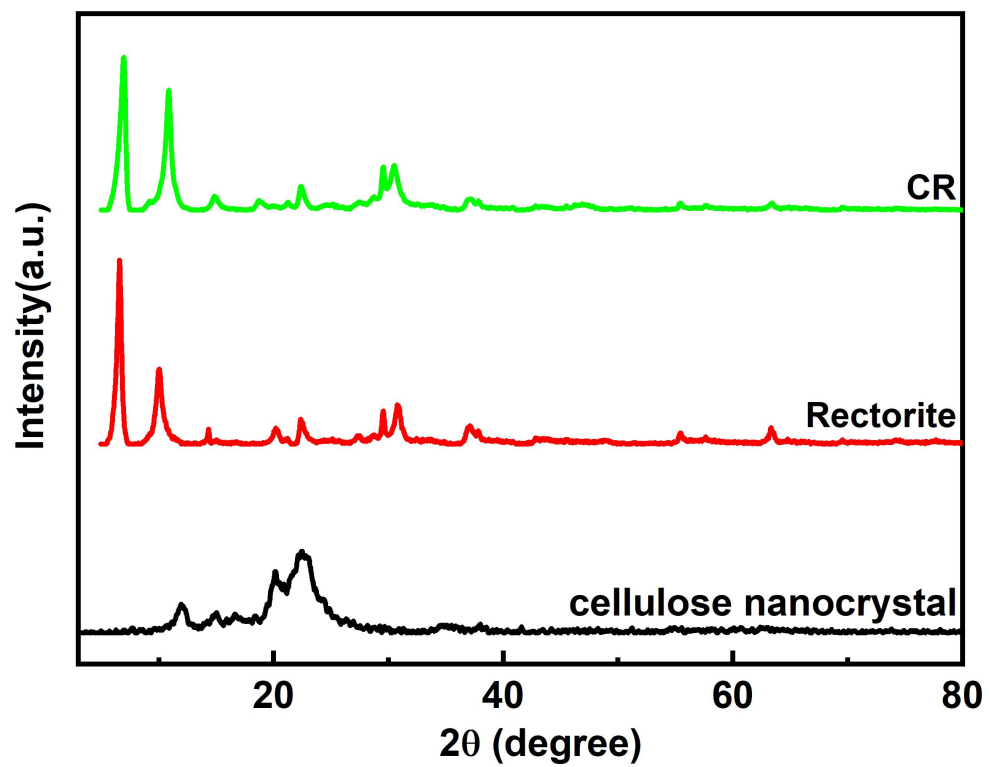

Fig. S3 XRD patterns of cellulose nanocrystal, rectorite and CR.

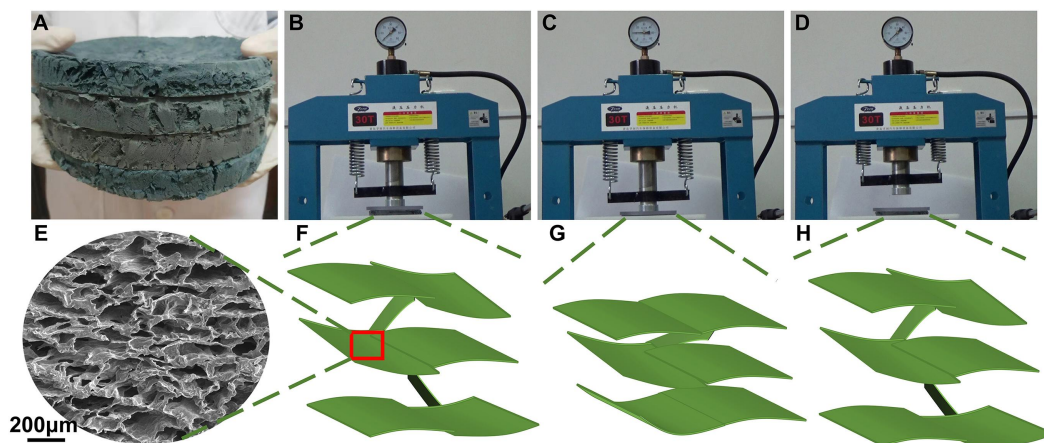

**Fig. S4** (A) Photographs of CR/PA/PVA aerogels with a diameter of 14 cm. (B-D) CR/PA/PVA-RT aerogels can support pressure of 10 kN at 80% strain and quickly recover to its original height. (E-H) Schematics of compression and elasticity mechanism of CR/PA/PVA aerogel.

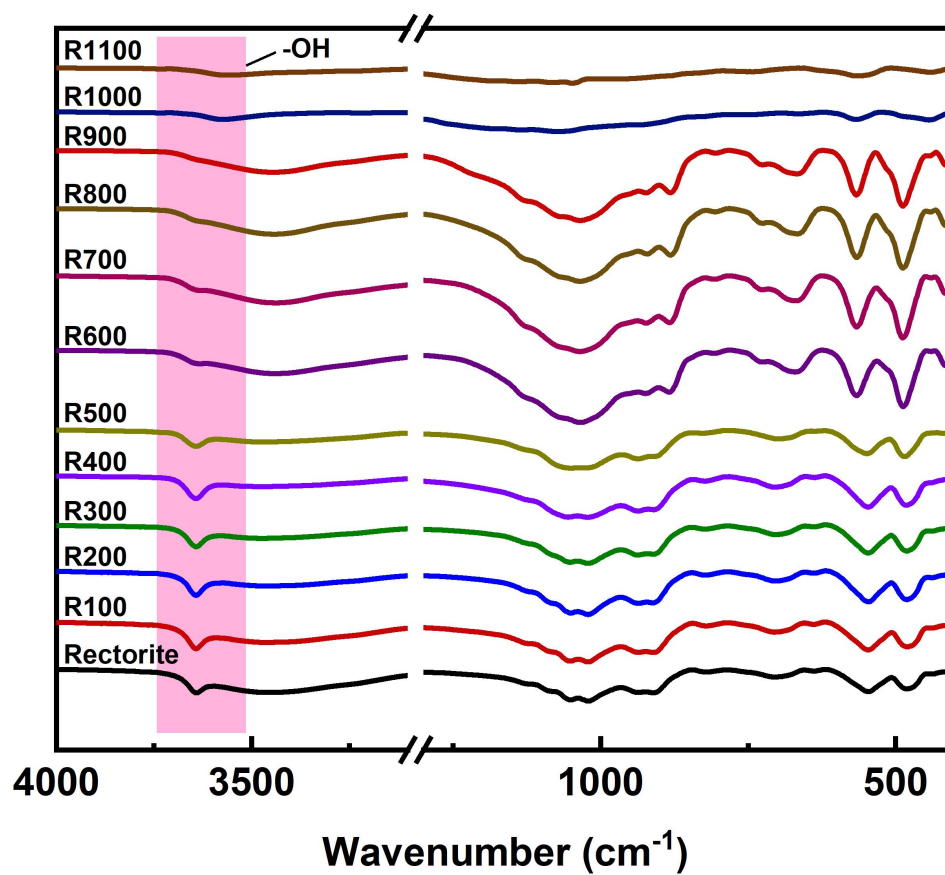

**Fig. S5** FTIR spectra of rectorite nanoclay. (R100-R1100 refer to rectorite calcined at 100-1100 °C, respectively. Calcination was performed in a laboratory programmable muffle furnace at a heating rate of 10 °C/min. After being kept at the target temperature for 2 h, it was naturally cooled to RT).

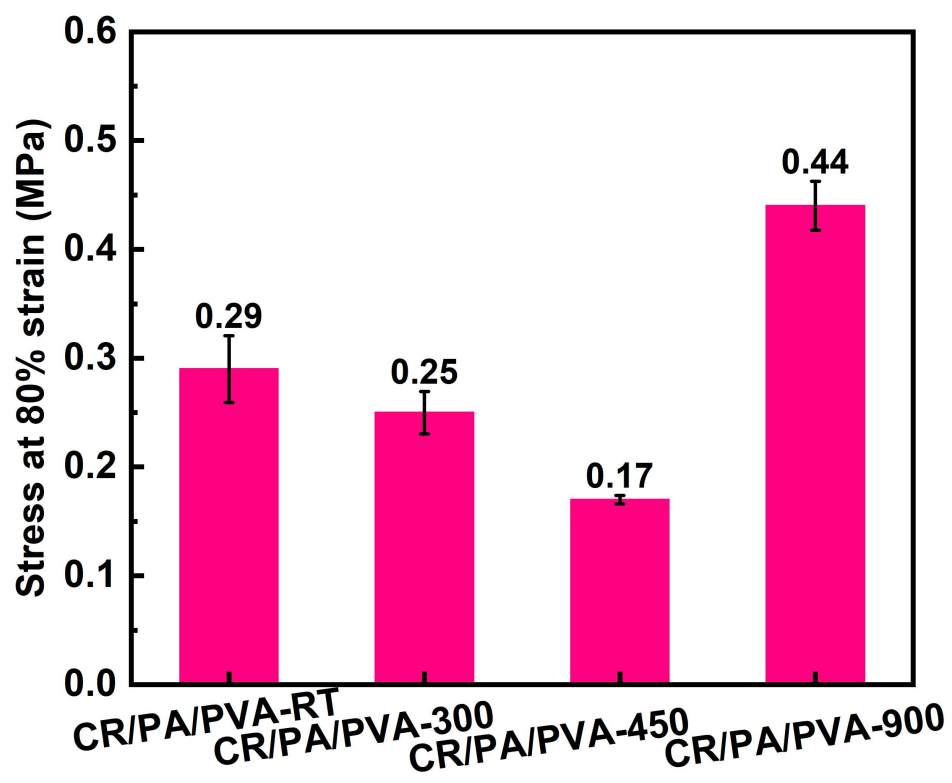

Fig. S6 Value of compressive strength obtained based on Fig. 2h at 80% strain.



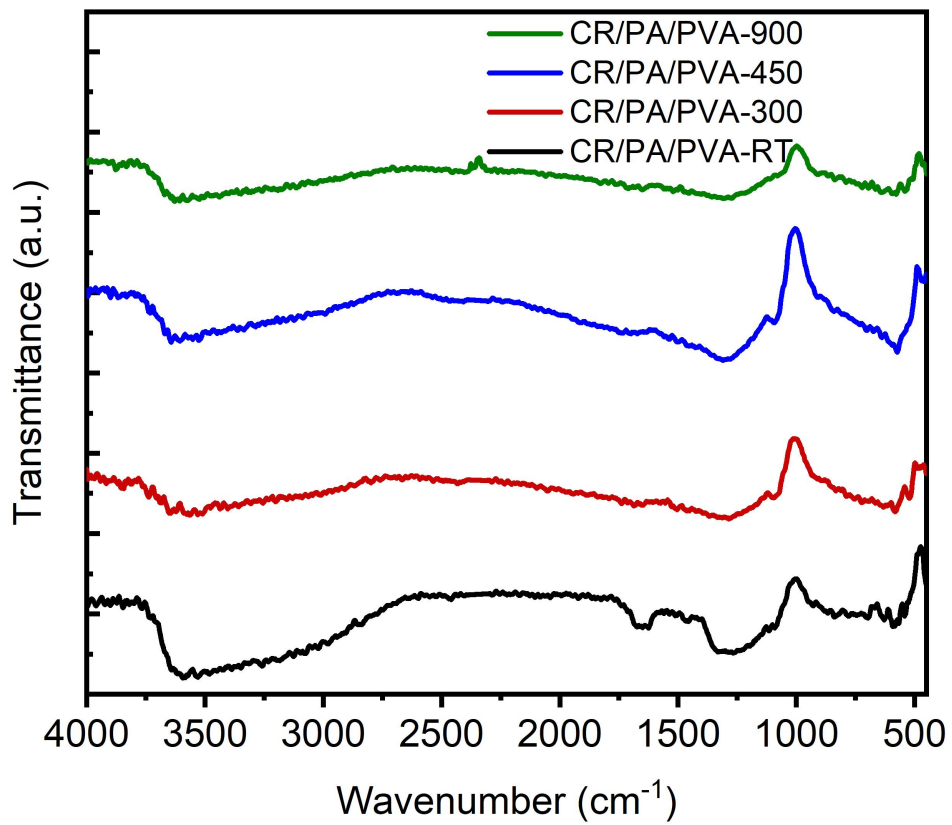

**Fig. S7** FTIR spectra of the CR/PA/PVA aerogels.

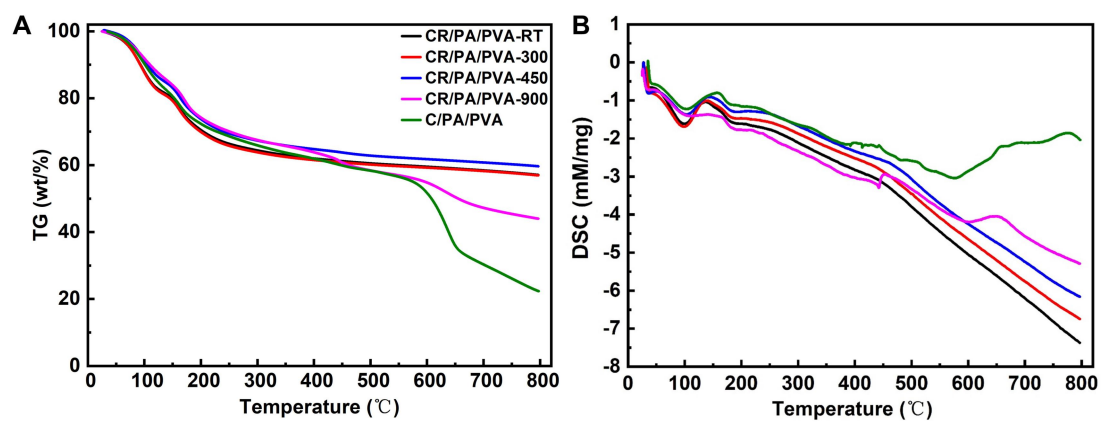

**Fig. S8** (A) TGA weight loss and (B) DSC curves of CR/PA/PVA aerogels and control aerogel.

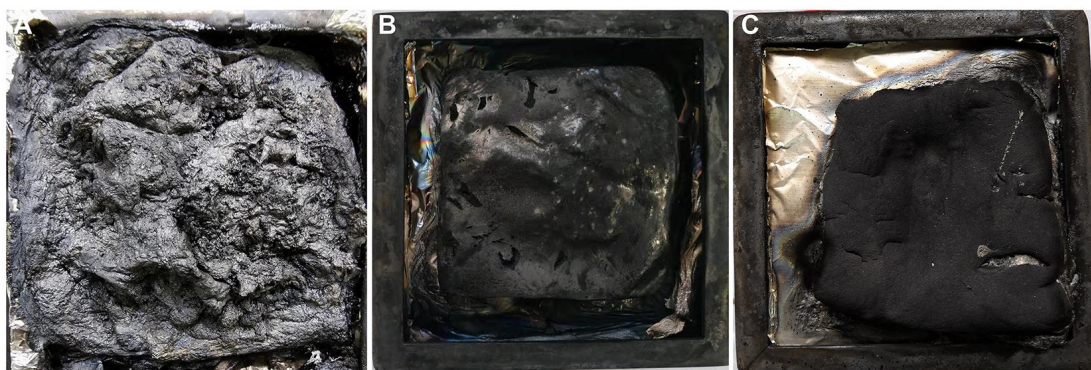

**Fig. S9** Photographs of residues after cone calorimeter tests for (A) C/PA/PVA, (B) CR/PA/PVA-RT, and (C) CR/PA/PVA-900.

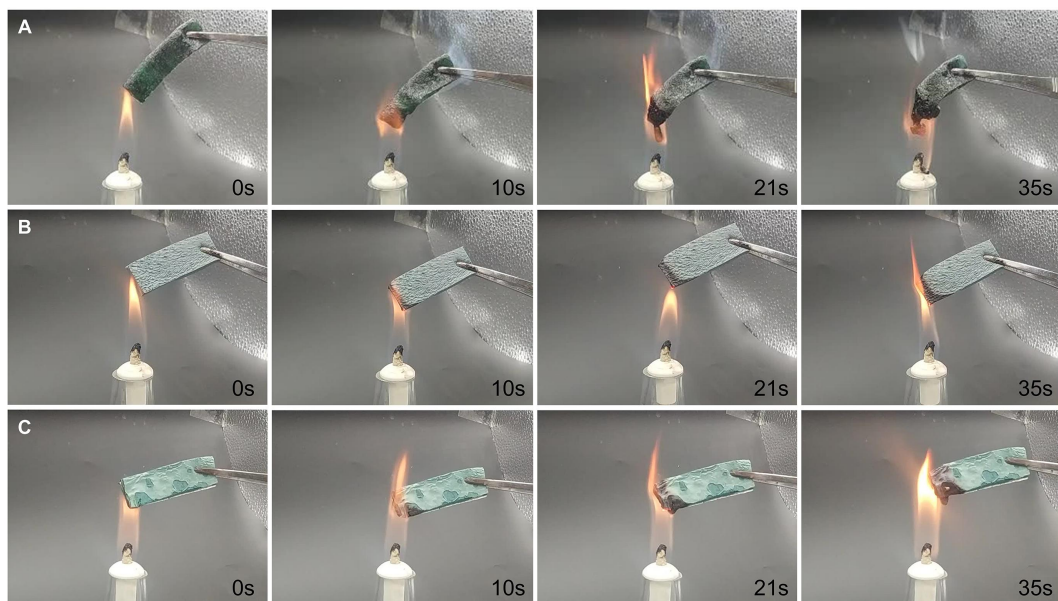

**Fig. S10** Photographs of alcohol lamp combustion experiments of (A) C/PA/PVA, (B) CR/PA/PVA-RT, and (C) CR/PA/PVA-900. Magnification corresponding to inset of Fig. 5.

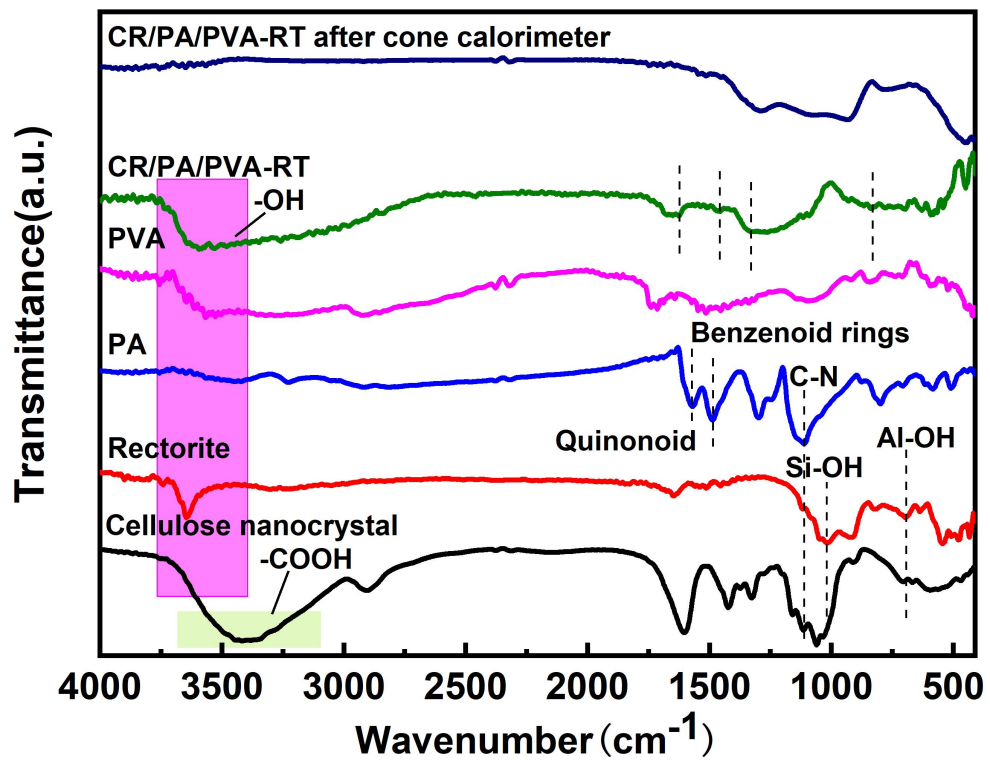

**Fig. S11** FTIR spectra of cellulose nanocrystals, rectorite, PA, PVA, CR/PA/PVA-RT aerogel, and CR/PA/PVA-RT aerogels after cone calorimeter tests.

**Table S1** Cone calorimeter data of obtained aerogels

| Sample        | Ignition time<br>(s) | Peak heat-release rate<br>(kW/m <sup>2</sup> ) | Total heat release<br>(MJ/m <sup>2</sup> ) | Total smoke release<br>(m <sup>2</sup> /m <sup>2</sup> ) |
|---------------|----------------------|------------------------------------------------|--------------------------------------------|----------------------------------------------------------|
| C/PA/PVA      | 24                   | 37.1                                           | 5.69                                       | 522.7                                                    |
| CR/PA/PVA-RT  | 249                  | 12.9                                           | 1.3                                        | 72.6                                                     |
| CR/PA/PVA-300 | 273                  | 14.2                                           | 1.4                                        | 49.4                                                     |
| CR/PA/PVA-450 | No flame             | 8.3                                            | 2.0                                        | 77.6                                                     |
| CR/PA/PVA-900 | 126                  | 13.6                                           | 1.2                                        | 338.8                                                    |

**Table S2** Comparison of mechanical properties and flame retardancy of CR/PA/PVA aerogels with other clay-based composite aerogels

| Sample                                  | Density<br>(g/cm <sup>3</sup> ) | Ignition time<br>(s) | Peak heat-release<br>rate (kW/m <sup>2</sup> ) | Reference |
|-----------------------------------------|---------------------------------|----------------------|------------------------------------------------|-----------|
| PVA/MMT                                 | 0.093±0.003                     | 4                    | 140.1                                          | (1)       |
| PVA/MMT/AP                              | 0.115                           | —                    | 115                                            | (2)       |
| PVA/MMT/AP                              | 0.097±0.001                     | 6                    | 80.4                                           | (3)       |
| PVA/MMT/gelatin                         | 0.108±0.006                     | 3                    | 122                                            | (4)       |
| PVA/SA/MMT/boric acid/CaCl <sub>2</sub> | 0.306±0.012                     | 14±1                 | 82.1                                           | (5)       |
| SA/MMT                                  | 0.096±0.002                     | 192                  | 19.3                                           | (6)       |
| SA/MMT                                  | 0.098±0.001                     | 215                  | 22.7                                           | (7)       |
| Polyimide/graphene oxide/MMT            | 0.090±0.002                     | 4                    | 52.5                                           | (8)       |
| Xanthan gum/MMT                         | 0.056±0.001                     | —                    | 55.2                                           | (9)       |
| SA/MMT                                  | 0.11±0                          | No flame             | 20                                             | (10)      |
| CR/PA/PVA-RT                            | 0.105                           | 249                  | 12.9                                           | This work |
| CR/PA/PVA-450                           | 0.998                           | No flame             | 8.3                                            | This work |

**Notes:** MMT, montmorillonite; PVA, poly(vinyl alcohol); AP, ammonium polyphosphate; SA, sodium alginate

**Table S3** Comparison of mechanical properties and flame retardancy of CR/PA/PVA aerogels with other types of materials

| Sample                                               | Ignition time<br>(s) | Peak heat-release rate<br>(kW/m <sup>2</sup> ) | Compression<br>strength (kPa) | Reference |
|------------------------------------------------------|----------------------|------------------------------------------------|-------------------------------|-----------|
| MFR/pectin                                           | 27                   | 80.1                                           | —                             | (11)      |
| PFR/SiO <sub>2</sub>                                 | —                    | 19±1                                           | 150                           | (12)      |
| Cellulose composite                                  | 9                    | 58.51                                          | 1600                          | (13)      |
| Co <sub>3</sub> O <sub>4</sub> -graphene/epoxy resin | —                    | 329                                            | —                             | (14)      |
| PP/fullerene and carbon nanotubes                    | —                    | 400±25                                         | —                             | (15)      |
| CR/PA/PVA-RT                                         | 249                  | 12.9                                           | 178.8                         | This work |
| CR/PA/PVA-450                                        | No flame             | 8.3                                            | 42                            | This work |

**Notes:** MFR, melamine-formaldehyde resin; PP, polypropylene; PFR, phenol-formaldehyde resin



## References

1. H.B. Chen, B. Liu, W. Huang, J.S. Wang, G. Zeng, W.H. Wu, D.A. Schiraldi, *ACS Appl. Mater. Inter.*, 2014, **6**, 16227-16236.
2. L. Wang, M. Sánchez-Soto, M.L. MasPOCH, *Mater. Design.* 2013, **52**, 609-614.
3. Y.T. Wang, S. F. Liao, K. Shang, M.J. Chen, J.Q. Huang, Y.Z. Wang, D.A. Schiraldi, *ACS Appl. Mater. Inter.*, 2015, **7**, 1780-1786.
4. Y.T. Wang, H.B. Zhao, K. Degracia, L.X. Han, H. Sun, M.Z. Sun, Y.Z. Wang, D.A. Schiraldi, *ACS Appl. Mater. Inter.*, 2017, **9**, 42258-42265.
5. N.J. Wu, F.K. Niu, W.C. Lang, M.F. Xia, *Carbohydr. Polym.*, 2019, **221**, 221-230.
6. X.L. Li, M.J. Chen, H.B. Chen, *Compos. Part. B.*, 2019, **164**, 18-25.
7. H.B. Chen, Y.Y. Ao, D. Liu, H.T. Song, P. Shen, *Int. Eng. Chem. Res.*, 2017, **56**, 8563-8567.
8. L.Z. Zuo, W. Fan, Y.F. Zhang, L.S. Zhang, W. Gao, Y.P. Huang, T.X. Liu, *Compos. Sci. Technol.* 2017, **139**, 57-63.
9. L. Wang, D. A. Schiraldi, M. Sánchez-Soto, *Ind. Eng. Chem. Res.*, 2014, **53**, 7680-7687.
10. H.B. Chen, P. Shen, M.J. Chen, H.B. Zhao, D.A. Schiraldi, *ACS Appl. Mater. Inter.* 2016, **8**, 32557-32564.
11. H.B. Chen, X.L. Li, M.J. Chen, Y.R. He, H.B. Zhao, *Carbohydr. Polym.*, 2019, **206**, 609-615.
12. Z.L. Yu, N. Yang, V. Apostolopoulou-Kalkavoura, B. Qin, Z.Y. Ma, W.Y. Xing, C. Qiao, L. Bergström, M. Antonietti, S.H. Yu, *Angew. Chem. Int. Edit.*, 2018, **57**, 4538-4542.
13. X.L. Luo, J.Y. Shen, Y.N. Ma, L. Liu, R.J. Meng, J.M. Yao, *Carbohydr. Polym.*, 2020, **230**, 115623.
14. X. Wang, W.Y. Xing, X.M. Feng, B. Yu, H.D. Lu, L. Song, Y. Hu, *Chem. Eng. J.*, 2014, **250**, 214-221.
15. P.G. Song, Y. Shen, B.X. Du, Z.H. Guo, Z.P. Fang, *Nanoscale*, 2009, **1**, 118-121.

## **Movies S1 to S5**

**Movie S1.** Demonstration of the excellent compression resilience of CR/PA/PVA composite aerogels.

**Movie S2.** Demonstration that the CR/PA/PVA aerogel with a diameter of 14 cm can withstand a pressure of 10 kN and has good resilience.

**Movie S3.** Demonstration of the burning process of CR/PA/PVA composite aerogel on a cone calorimeter.

**Movie S4.** Demonstration of the burning process of C/PA/PVA composite aerogel on a cone calorimeter.

**Movie S5.** Demonstration of three kinds of aerogels being combusted on an alcohol lamp, including C/PA/PVA, CR/PA/PVA, and CR/PA/PVA-900.
